# Supplementary material
Source: Royal Society of Chemistry journal article supplement (doi:10.1039/d6dt00509h)
Supplement: d6dt00509h1.pdf [file d6dt00509h1.pdf]

## Supplementary Information

### Incorporation of isophthalate ion derivatives into octacalcium phosphate for enhanced diagnostic bioimaging applications

Sarisa Trithipchatsakul,<sup>\*a</sup> Mio Yoshizaki,<sup>a</sup> Yuejun Wang,<sup>a</sup> Masaya Shimabukuro,<sup>b</sup> Atsunori Matsuda,<sup>c</sup> Masakazu Kawashita,<sup>b</sup> Charusluk Viphavakit and Taishi Yokoi<sup>\*b</sup>

<sup>a</sup> Graduate School of Medical and Dental Sciences, Institute of Science Tokyo, 1-5-45 Yushima, Bunkyo-ku, Tokyo 113-8549, Japan.

<sup>b</sup> Laboratory for Biomaterials and Bioengineering, Institute of Integrated Research, Institute of Science Tokyo, 2-3-10, Kanda-Surugadai, Chiyoda-ku, Tokyo 101-0062, Japan.

<sup>c</sup> Department of Electrical and Electronic Information Engineering, Toyohashi University of Technology, 1-1 Hibirigaoka, Tempaku-cho, Toyohashi, Aichi 441-8580, Japan.

<sup>d</sup> International School of Engineering, Biomedical Materials and Devices for Revolutionary Integrative Systems Engineering Research Unit (BMD-RISE), Faculty of Engineering, Chulalongkorn University, Bangkok 10330, Thailand

Corresponding Author

Sarisa Trithipchatsakul

Graduate School of Medical and Dental Sciences, Institute of Science Tokyo, 1-5-45 Yushima, Bunkyo-ku, Tokyo 113-8549, Japan.

Email: ma250507@tmd.ac.jp

## Characterisation

The elemental composition of the SuIP-OCP was determined by X-ray photoelectron spectroscopy (XPS, PHI 5000 Versa Probe III, Ulvac-Phi, Japan). The excitation source used was Al K $\alpha$  radiation at 50 W and 200  $\mu$ M. The vacuum degree at  $1.7 \times 10^{-6}$  Pa, and an Ar ion gun was employed during measurement. The pass energy was set to 224 eV and 27 eV for the wide scan and narrow scan, respectively. C1s is utilized as a reference peak for calibration.

## XPS spectrum of SuIP-OCP

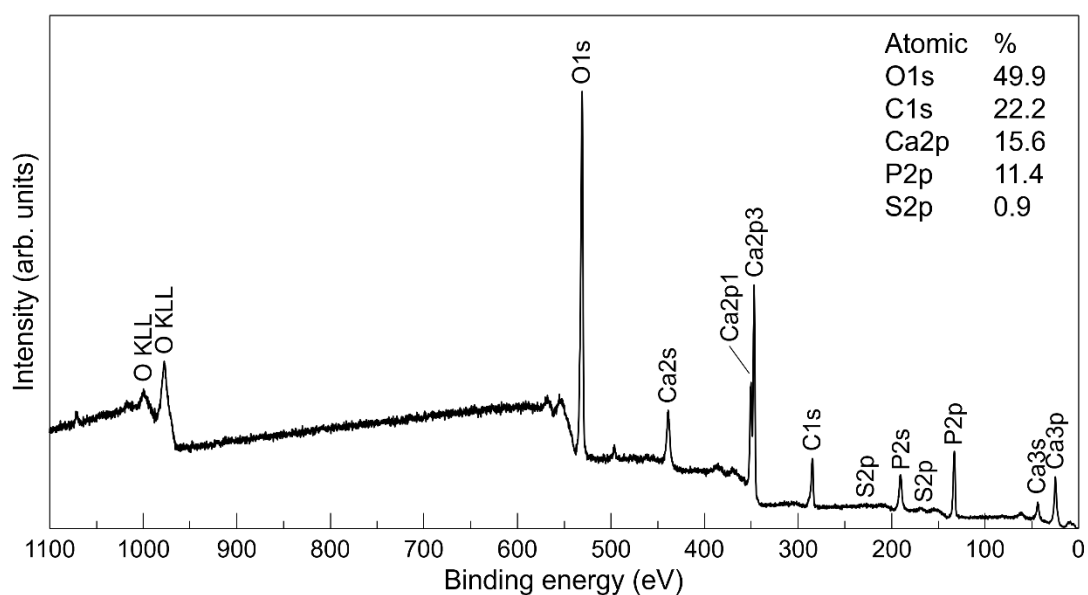

**Figure S1.** XPS spectrum of O1s, C1s, Ca2p, P2p, and S2p obtained from SuIP-OCP.
